# **Multi-Omics Binary Integration via Lasso Ensembles (MOBILE) for identification of context-specific networks and new regulatory mechanisms**

Cemal Erdem<sup>1</sup>, Sean M. Gross<sup>2</sup>, Laura M. Heiser<sup>2,\*</sup>, and Marc R. Birtwistle<sup>1,3,\*</sup>

<sup>1</sup> Department of Chemical and Biomolecular Engineering, Clemson University, Clemson, SC

<sup>2</sup> Department of Biomedical Engineering, Oregon Health & Science University, Portland, OR

<sup>3</sup> Department of Bioengineering, Clemson University, Clemson, SC

\* Correspondence: [heiserl@ohsu.edu](mailto:heiserl@ohsu.edu) (L.M.H.); [mbirtwi@clemson.edu](mailto:mbirtwi@clemson.edu) (M.R.B.)

9     **Graphical Summary**

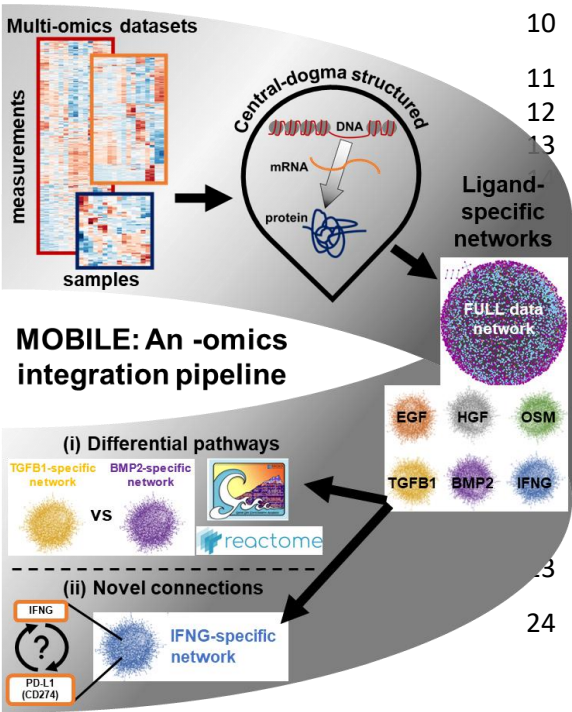

10  
11     **Multi-Omics Binary Integration via Lasso**  
12     **Ensembles (MOBILE) pipeline yields**  
13     **statistically robust, context-specific**  
14     **association networks**

The MOBILE pipeline integrates omics datasets in a data-driven, biologically-structured manner.

The pipeline outputs are gene-level, context-specific association networks.

These association networks nominate differentially enriched pathways, subnetworks, and new connections.

Broadly applicable to find condition specific networks using multi-omics datasets.

# **Abstract**

Cell phenotypes are dictated by both extra- and intra-cellular contexts, and robust identification of context-specific network features that control phenotypes remains challenging. Here, we developed a multi-omics data integration strategy called MOBILE (Multi-Omics Binary Integration via Lasso Ensembles) to nominate molecular features associated with specific cellular phenotypes. We applied this method to chromatin accessibility, mRNA, protein, and phosphoprotein time course datasets and focus on two illustrative use cases after we show MOBILE could recover known biology. First, MOBILE nominated new mechanisms of interferon- $\gamma$  (IFN $\gamma$ ) regulated PD-L1 expression, where analyses suggested, and literature supported that IFN $\gamma$  controlled PD-L1 expression involves BST2, CLIC2, FAM83D, ACSL5, and HIST2H2AA3 genes. Second, we explored differences between the highly similar transforming growth factor-beta 1 (TGF $\beta$ 1) and bone morphogenetic protein 2 (BMP2) and showed that differential cell size and clustering properties induced by TGF $\beta$ 1, but not BMP2, were related to the laminin/collagen pathway activity. Given the ever-growing availability of multi-omics datasets, we envision that MOBILE will be broadly applicable to identify context-specific molecular features associated with cellular phenotypes.

# Introduction

The availability of large-scale multi-omics datasets across cell types, tissues, and organisms is rapidly increasing with the development of new technologies (1–7). The challenge now is in analyzing them, not individually, but rather together to leverage the fact that signals are encoded across multiple modalities (8–11). Examples of individual methods include: principal components analysis (12), statistical approaches (13–15), clustering (16–19), unsupervised learning (20), supervised learning (21–23), and machine learning (10,24). Often, such analyses are used to generate networks, where genes (or other biomolecules) are nodes, and edges between them denote statistical or functional relationships. Integrating data from multiple modalities can give rise to novel biological insights that cannot be obtained by analyzing single datasets alone (25–27). To date, data integration methods have produced systems-level biological insights including genetic and protein-protein interactions (28–30), disease-gene relationships (24,31), drug response predictions (30,32) and context-specific associations (29,31,33).

A central problem in network biology is understanding what aspects of networks are “context-specific”. Here we define context-specificity as a biological relationship (i.e., edge in a network) that applies only to a certain cell type, stimulatory ligand perturbation, extracellular matrix component, or time point. Data integration may have a significant impact on understanding such context-specific biology, since previous one-at-a-time methods struggle due to the nature of the input data available (8). For instance, why does insulin, but not insulin-like growth factor I (IGF1), regulate glucose metabolism despite their textbook signaling pathways being essentially identical (34–36)? Why does IGF1 activate ERK or AKT signaling only in certain cell types (37,38)? Identifying and studying such context-specific knowledge is important because, first, most diseases have tissue-specificity, and context-specific knowledge could complement available omics data in discovering disease-gene associations (39). Secondly, this enables understanding

of how different cell types respond uniquely to varied perturbations, which is key to targeted therapeutic intervention.

There are currently two broad classes of approaches for data integration; one using prior literature / network knowledge as an essential first step (28–33,40–43), and the other not. For example, a prior-knowledge informed network analysis may limit the exploration to curated pathways and remove analytes (measured features) with no known interactions, or may impose biological structure into the underlying network models (29,30). These literature-driven approaches assemble available tissue-specific expression data into gene correlation networks (30,44,45) or overlay the data on global (non-specific) interaction networks (9,28,46). For instance, employing a network/graph theory-based approach coupled with prior literature information, differential network analysis (46–49) tools showed promise in identifying context-specific knowledge (50–59) and helped highlight genes and pathways for clinical impact (11,49,54). While informative, the drawback of such “literature-first” data integration methods is that they only allow study of known connections. This is limiting because a substantial number of regulatory interactions between proteins, mRNAs, micro RNAs, metabolites, and transcription factors are not annotated in the literature (30,46,60). Importantly, these approaches cannot identify novel interactions or associations in the datasets.

The second class of data integration approaches are prior knowledge agnostic, which circumvents the limitations of literature-first methods (24,61–64). These methods rely on extracting features from the input data and constructing models to discriminate between conditions. For instance, Zhang et al. used deep learning to integrate gene expression and copy number variance data from two different databases to identify distinct prognostic subtypes (24). However, the trade-off of these methods is that they are more challenging to interpret because they lack direct incorporation of a biological structure (e.g., central dogma) into the data

integration methodology, and also do not take advantage of the wealth of available prior knowledge (11,65,66).

Despite progress, there remains a need for new tools and methods for biologically informed multi-omics integration without literature-driven pre-selection. Here, we introduce **Multi-Omics Binary Integration via Lasso Ensembles (MOBILE)** to integrate multi-omics datasets and identify context-specific interactions and pathways. Our approach does not eliminate data based on prior knowledge and also uses well-established central dogma structure to aid biological interpretation. Robust associations are inferred between pairs of chromatin accessibility regions, mRNA expressions, and protein/phosphoprotein levels. By imposing this high-level structure, MOBILE is neither network structure agnostic (for better interpretability) nor heavily prior-knowledge bound (for higher rates of novelty). We demonstrate the method using a recent multi-omics dataset generated by the NIH LINCS Consortium (67). In that project, we profiled non-tumorigenic breast epithelial MCF10A cells and collected proteomic, transcriptomic, epigenomic, and phenotypic time courses in response to six growth factor perturbations (EGF, HGF, OSM, IFN $\gamma$ , TGF $\beta$ 1, and BMP2; [synapse.org/LINCS\\_MCF10A](https://synapse.org/LINCS_MCF10A)). We apply MOBILE to this dataset and obtain candidate context-specific associations. We then use these associations (i) to propose novel sub-networks of regulation for therapeutically important genes and (ii) to identify pathways preferentially activated by pairs of ligands from similar signaling families. First, MOBILE identifies new regulatory mechanisms for IFN $\gamma$ -controlled PD-L1 expression that have independent literature support. Secondly, MOBILE reveals and independent experiments validate that TGF $\beta$ 1 but not BMP2 induces laminin pathway genes (especially laminin 5), causing stronger cell-to-cell and cell-to-surface adhesion through interactions with extracellular collagen, which leads to larger and more separated cells. The biologically structured and data-driven MOBILE pipeline outlined here is widely applicable to integrate omics datasets for extracting context-specific network features and insights.

# **Results**

## **A multi-omics LINCS perturbation dataset for integrative analysis**

The NIH LINCS Consortium recently released a unique and comprehensive multi-omics dataset (synapse.org/LINCS\_MCF10A). This data set consists of molecular and phenotypic responses of MCF10A cells to multiple ligand perturbations over time (67). Spanning a compendium of canonical receptor signaling classes, EGF, HGF, and OSM induced growth while BMP2, IFN $\gamma$ , and TGF $\beta$ 1 inhibited growth. The cellular responses were measured using live-cell imaging, immunofluorescence (IF), and cyclic immunofluorescence (68). The bulk molecular responses were assessed across five platforms. The proteomic assay was reverse phase protein array (RPPA (69)), where specific phospho- or total protein levels were measured at 1, 4, 8, 24, and 48 hours. The RNAseq transcriptomic dataset was single-end sequencing at 24 and 48 hours. Chromatin accessibility was profiled by Assay for Transposase-Accessible Chromatin using sequencing (ATACseq), also at 24 and 48 hours after stimulation. A pretreatment (T0 control) was quantified for all assay types. Additionally, the dataset included global chromatin profiling (GCP) and L1000 transcriptomics readouts (70,71). Overall, the MCF10A dataset provides an excellent template for applying the proposed data integration strategies, namely ATACseq, RNAseq, and RPPA as “big data” to be integrated, and the live-cell imaging / IF as assays informing associated cellular phenotypes.

## **The MOBILE Integrator**

We here integrated data from this LINCS dataset to identify context-specific pathways and novel regulatory mechanisms that control cellular phenotypes. We reasoned that a data-driven approach whose structure was supported by biological organization could be valuable. The overall approach is summarized in Fig. 1 and presented in greater detail in Fig. 2. The availability of epigenomic, transcriptomic, and proteomic datasets inspired a central-dogmatic view for data

integration (Fig. 1). For compatibility across datasets and operability of the method, the MOBILE pipeline input included all three datasets with all ligands at 24 and 48 hours only.

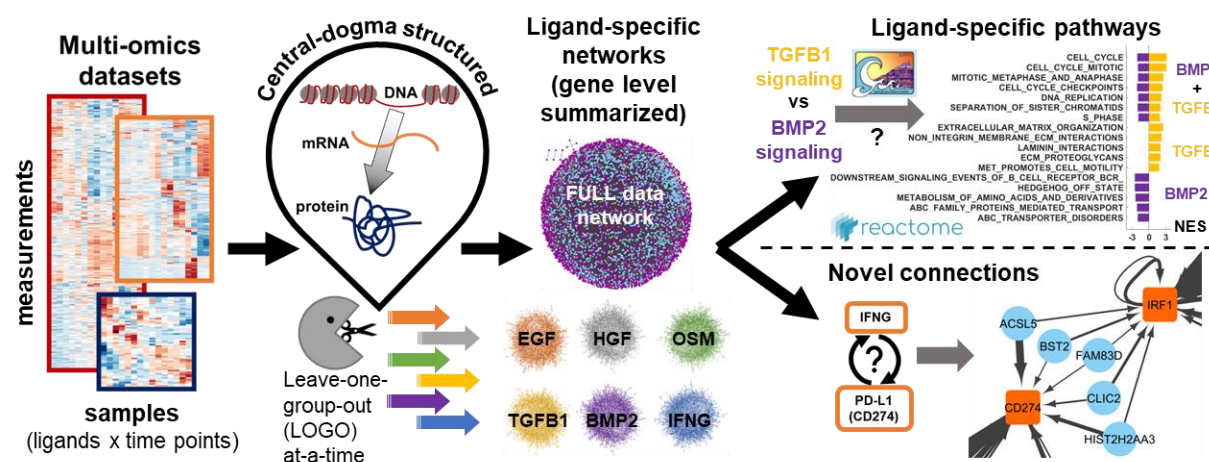

**Fig. 1 Multi-Omics Binary Integration via Lasso Ensembles (MOBILE) pipeline yields statistically-robust, ligand-specific association networks.** The MOBILE data integrator combines multi-omics, multi-assay datasets in a data-driven and central-dogmatic way. By leaving each ligand condition out from the input at-a-time, the pipeline outputs robust ligand-specific association networks. These gene-level networks are used to infer differentially enriched pathways and to find novel regulatory sub-networks.

Following the central dogma that information flows from DNA to RNA to protein, we paired ATACseq-RNAseq and RNAseq-RPPA matrices. First, we calculated robust and parsimonious statistical associations between features of input data (Fig. 2a, see Methods) using replicated penalized regression models (Fig. 2b, Supplementary Data 1 and 2). We applied Lasso (least absolute shrinkage and selection operator (37,72)) regression to infer sets of sparse matrices that can be interpreted as statistical networks connecting biochemical species, such as mRNAs, chromatin peaks, or total protein and phosphorylation levels. The repetitive application of Lasso, called the Lasso module, yielded an ensemble of such matrices, from which we picked the matrix with the greatest number of robustly inferred associations as the robust associations matrix. When we used all the ligand conditions from the LINCS dataset as input, the Lasso module output is called the FULL-data matrix. To finalize the data integration and generate data-driven networks, we merged the robust associations matrices obtained from RPPA+RNAseq and



RNAseq+ATACseq input pairs into an Integrated Association Network (IAN) (Fig. 2c). The IANs were coalesced gene-level networks, where nodes represent genes of the assay analytes (genes from input matrix rows), and edges represent robust Lasso coefficients calculated between the analyte levels (Supplementary Fig. 1).

We then systematically excluded different ligand conditions (both 24- and 48-hr data) from the training input and ran the LOGO (leave-one-group-out) module (Fig. 2d). We hypothesized that the robust associations that change as a result of this LOGO analysis will have information regarding the context-specificity of the left-out ligand condition. The ligand-specific IANs together with the FULL IAN were the major data-integration products of the MOBILE. Comparison of pairs of ligand IANs nominated differentially activated pathways and novel, ligand-specific regulatory mechanisms spanning DNA states to protein levels. To extract this information, we performed gene-set enrichment analysis (GSEA (73)), which revealed significantly enriched pathways based on the IAN gene lists. Here, using the Reactome database (74) enabled us to identify pathways linked to ligand-specific IANs. By analyzing the enriched pathways and relating them to the corresponding phenotypic responses, we nominated ligand-specific pathways and novel edges playing a role in the distinct phenotypes (Fig. 2e).

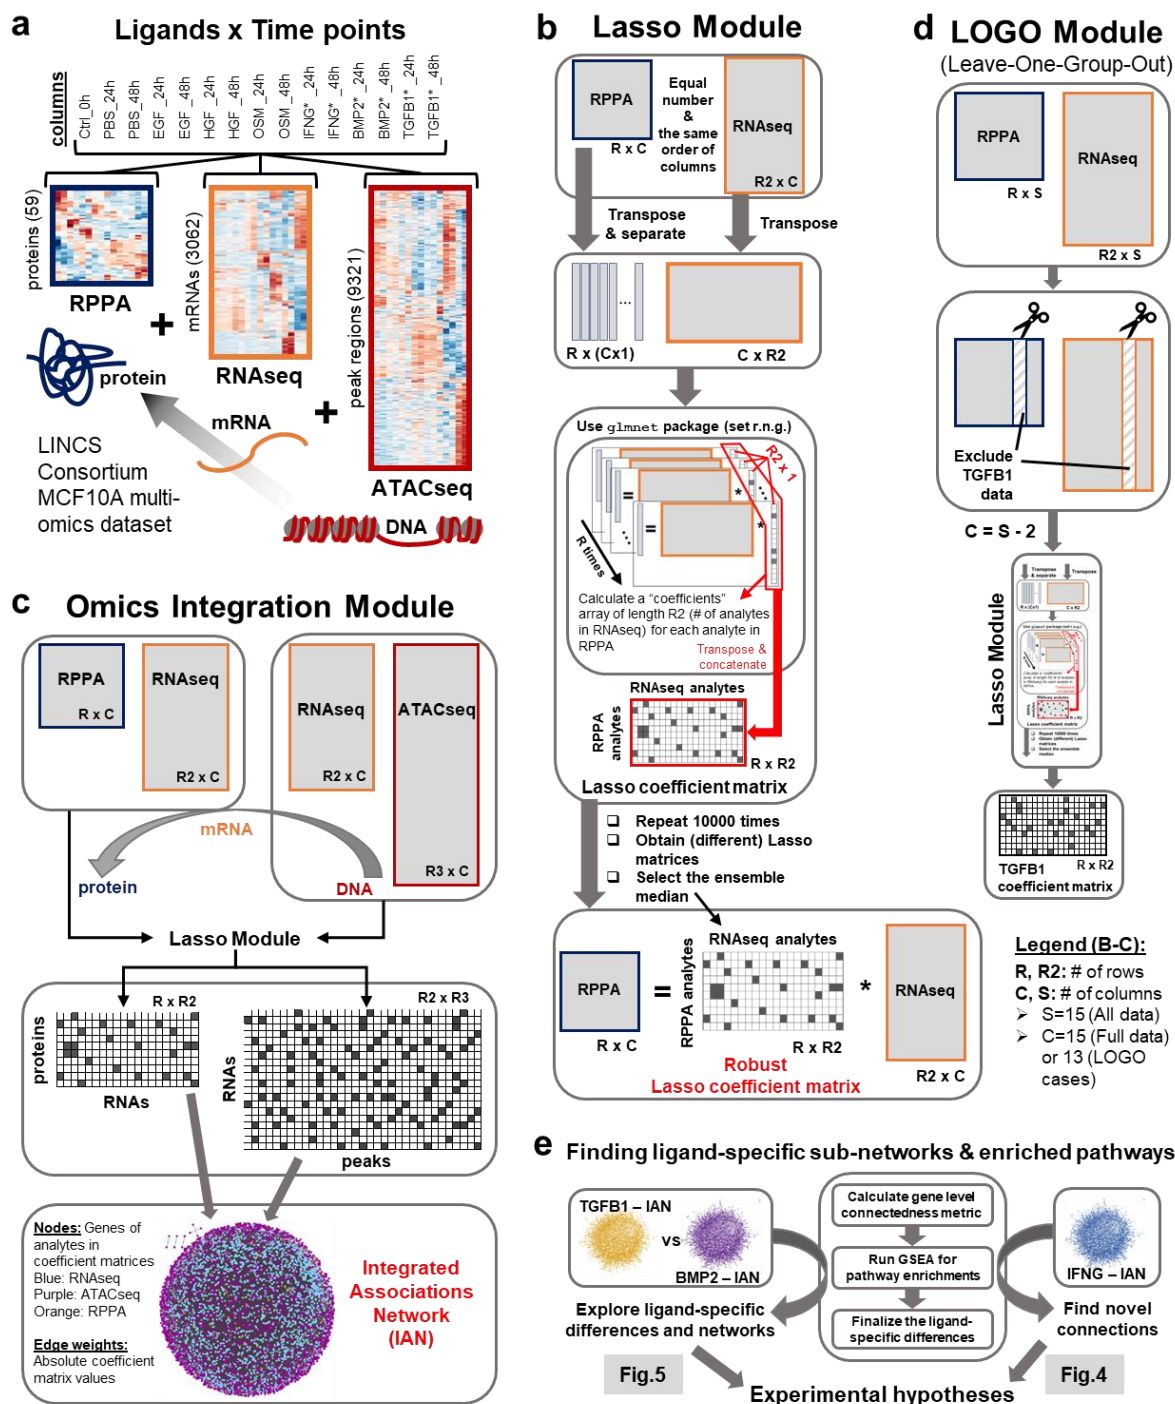

**Fig. 2 The MOBILE Integrator pipeline transforms input data into gene-level association networks.**  
**a** The NIH LINCS MCF10A omics datasets include proteomic (RPPA), transcriptomic (RNAseq), and epigenomic (ATACseq) assays measured for six ligands + control at 24 and 48 hours. The number of analytes retained after data pre-processing are shown in parentheses in y-axis. The heatmaps shown are actual results from hierarchical clustering of rows. The data show that most ligand conditions at two time points are more similar to each other than to another ligand condition at the same time point. **b** The Lasso module is used to integrate omics datasets one pair at a time. The associations between peaks of open chromatin regions (ATACseq) and mRNA levels (RNAseq) and between mRNA levels and protein levels

(RPPA) are calculated separately. The two assay input matrices are structured in a way that yields a robust Lasso coefficient matrix, which contains association coefficients between analytes of the two input matrices. The pipeline iteratively applies the lasso algorithm to each row of the input data matrix on the left-hand side and calculates one row of the Lasso coefficients matrix. Minimizing the mean squared error and penalizing the L1 norm, only a few non-zero coefficients are selected at each iteration. The resulting coefficient vectors for every analyte are concatenated to obtain a single Lasso coefficient matrix instance. Each non-zero element of this matrix represents the regression coefficient obtained for the effect of the analyte of right-hand-side input matrix on the level of analyte in the left-hand-side input matrix: the effect of mRNA levels on (phospho)protein levels or the effect of open chromatin peak regions on mRNA levels. Ten thousand instances of the Lasso coefficient matrix are generated, starting each with a different seed for random number generator. The coefficients that appear in at least half the matrices (>5000 times) are considered robust and the representative matrix with the largest number of robust coefficients is selected as the robust Lasso coefficient matrix. The coefficients (non-zero elements) in this matrix are called associations for the remainder of this work. **c** The robust Lasso coefficient matrices of two different pairs of datasets (i.e. RPPA+RNAseq and RNAseq+ATACseq) are combined to generate Integrated Association Networks (IANs) for each ligand condition. These gene-level networks represent robust, statistical associations inferred from multi-omics datasets, offering a new hypotheses generation tool to look for ligand or gene-set specific sub-networks. Node colors represent; blue:RNAseq, purple:ATACseq, and orange:RPPA and the edge widths correlate with the magnitude of the association coefficients. **d** We employ a leave-one-group-out (LOGO) analysis to find associations that show-up or disappear depending on exclusion/inclusion of that specific condition. We exclude one set of ligand conditions (24 and 48 hours) from the input matrices, run the Lasso module (**b**) with a smaller number of columns, and obtain a new robust Lasso coefficient matrix. Such matrices are called ligand-specific coefficient matrices. Comparing the resulting matrix from the LOGO module to the FULL-data Lasso coefficient matrix, we determine coefficients dependent on the existence of the corresponding ligand data. Finally, we combine the “ligand”-dependent coefficients with the coefficients that disappear from the FULL-data matrix (when “ligand” conditions are excluded from training) to create the final ligand-specific associations list. **e** Using the corresponding IANs, we generate a novel interactions sub-network of IFN $\gamma$  and PD-L1 relationship and explore TGF $\beta$ 1 and BMP2 enriched pathways.

## MOBILE identifies known biology

We investigated the robustness of the MOBILE predictions by performing a gene-set enrichment analysis (GSEA) for pathways using the FULL and ligand-specific integrated associations networks (IANs) and asking whether our approach can capture canonical biological observations. First, we identified ligand-dependent association lists by comparing each ligand IAN to the FULL IAN. Next, these association lists are coalesced into gene-level networks and the nodes are ranked based on the sum of edge weights (association magnitudes) entering that node (Supplementary Data 3). By running the GSEA on these eight (FULL, PBS, EGF, HGF, OSM, IFN $\gamma$ \*, BMP2\*, TGFB1\*) pre-ranked gene-lists, we saw that the top two/three enrichments ( $p < 0.05$  and  $FDR < 0.1$ ) are cell cycle pathways and are significantly enriched for all conditions (Fig. 3a, Supplementary Data 4). Indeed, eight of the top 15 pathway enrichments across

conditions are cell cycle related, affirming the fact that the LINCS dataset was generated using combinations of pro/anti-growth factors and cells continue to grow after all perturbations (Supplementary Fig. 2 and Supplementary Data 5).

Other highly enriched pathways in the HGF dependent gene-list were Rho GTPase related (Fig. 3a). It was shown before that Rho GTPase activity is required for HGF-induced cell scattering (75). OSM-dependent pathway enrichments included cytokine/interleukin and ECM pathways (Fig. 3a). The top four highly enriched pathways of IFNG\* condition were interferon signaling, in line with the fact that IFN $\gamma$  had a strong signal in the LINCS dataset (67). BMP2-dependent top pathways were ECM, interferon, and interleukin related in addition to the cell cycle. Finally, TGFB1\* condition had transcriptional and DNA regulatory pathways enriched (Fig. 3a). These observations confirmed that our approach can recover known biology and also that it can extract meaningful ligand-specific associations.

Next, we asked whether MOBILE-inferred associations (edges) are consistent with prior knowledge. The highest magnitude associations of the FULL analysis are the most robust ones across all perturbations and timepoints (Fig. 3b, Supplementary Data 1 and 2). Among them, the top candidate interaction is the connection between PPFIA4 (Protein Tyrosine Phosphatase Receptor Type F Polypeptide-Interacting Protein Alpha-4) and HIF1A (Hypoxia Inducible Factor 1 Subunit Alpha). The PPFIA4 gene was shown to be upregulated in response to hypoxia (through HIF1) in all types breast cancer cell lines and normal-like epithelial cells, including MCF10A (76). The highest association between ATACseq and RNAseq data was the SLC2A1 (Solute Carrier Family 2 Member 1) and CASP14 (Caspase 14). Interestingly, these two genes were also part of the hypoxia-induced genes list (76). There exists literature evidence for the other highest-ranking associations (Fig. 3b). Some were (i) shown to be part of prognostic markers (SLC12A4-CHEK2 (77)), (ii) differentially expressed together in response to perturbations (SEMA3C-TCEAL1 (78), IGFBP2-SIX1 (79), TINCR-POU2AF1 (80), NTSR1-TOMM6 (81)), and (iii) part of gene signatures

for different classes of tumors (SNORA73A-MAPK (82), FDCSP-GJA1 (83)). A few of the associations had related mechanistic interactions as well (CDC42-MTOR (84,85), IGFBP2-SIX1 (79), WTAP-STAT3 (86,87), TINCR-POU2AF1 (80)). The rest of the associations are either Self: same gene, different data type, Unknown: non-curated gene(s), or Novel: no known interactions. These pieces of information from the literature in-part verifies that the MOBILE inferred associations have biological meaning.

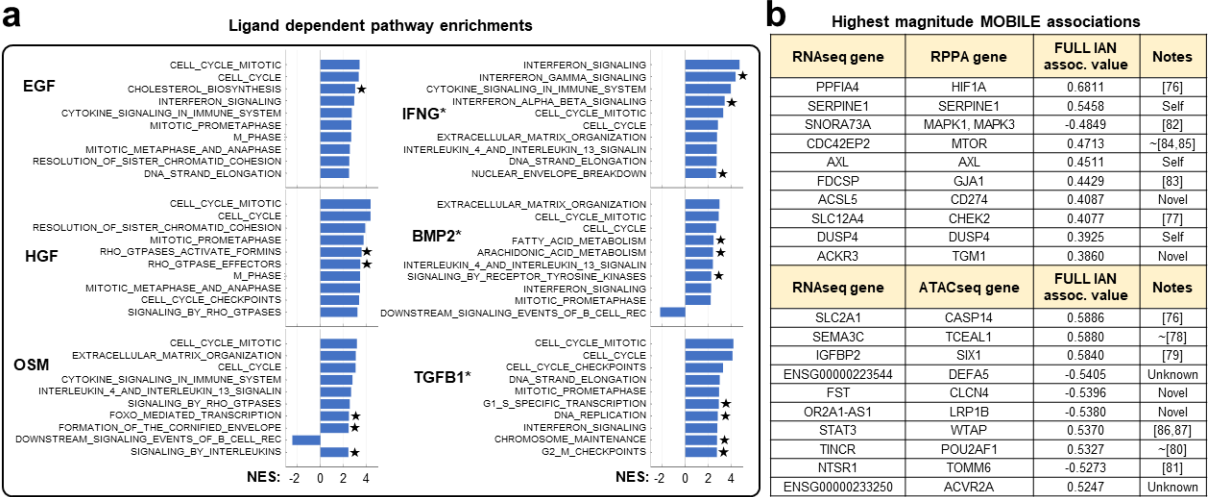

**Fig. 3 MOBILE inferred IANs are enriched for canonical pathways and the top associations are literature verified interactions.** **a** Gene set enrichment analysis using genes of ligand dependent associations reveal cell cycle, interferon, and cytokine signaling pathways. Only top 10 significantly enriched pathways are shown for each ligand perturbation (p-values < 0.05, FDR<0.1). The bar height corresponds to the normalized enrichment scores (NES). Stars (★) denote pathways enriched specifically for the corresponding ligand condition when only considered top 10 pathways shown. \* denotes conditions with additional EGF treatment. **b** MOBILE finds known and novel associations between proteins, transcripts, and chromosomal region genes. Top 10 magnitude-wise associations between RPPA-RNAseq and RNAseq-ATACseq of the FULL IAN are presented. More than half of the associations have prior literature evidence, while some are Self associations of the same gene in different assays. Two associations include non-annotated gene products and labeled as Unknown. At least four of the associations are Novel predictions of the MOBILE pipeline. ~ denotes references not showing direct (causative) relationship between the genes but co-mentioning them as biomarkers of different cancer subtypes or with relationships of candidates' isoforms. The MOBILE inferred association values are between -1 and 1.

### Identification of novel associations between IFN $\gamma$ stimulation and PD-L1 regulation

After establishing that MOBILE can recapitulate known biological interactions, we asked whether it could identify novel regulatory mechanisms within a single IAN. We focused on IFN $\gamma$ , which had a strong signal in the LINCS dataset (67) and is a critical part of the immune response within the

tumor microenvironment (88,89). The cytokines within the environment, especially IFN $\gamma$ , can induce transient PD-L1 (gene name: CD274) expression (Fig. 4a) (90–93). PD-L1 is a transmembrane protein that binds to its receptor PD-1 expressed in T-cells and inhibits immunological tumor clearance. Both PD-L1 and PD-1 belong to a class of so-called “checkpoint” proteins (91,94); immune checkpoint inhibitors are a new class of immunotherapeutic anti-cancer drugs (93,95). However, not all cancers or patients are responsive or have drug resistance to such therapy because of high PD-L1 expression variability (depending on tumor stage, tumor site, tumor type). Consequently, predicting tumor responses to PD-1/PD-L1 blockade remains a challenge, and better biomarkers are needed to stratify patients. Therefore, an in-depth understanding of the regulatory mechanism of PD-L1 expression is still needed to provide new immunotherapeutic insights and potentially identify new drugs (96). To investigate this question, we decided to explore novel sub-networks between IFN $\gamma$  signaling and PD-L1 expression within the data-driven IFN $\gamma$  integrated associations network.

In the LINCS dataset, IFN $\gamma$  was tested in combination with EGF, so here we compared the IFN $\gamma$  condition (IFN $\gamma$  + EGF) to EGF-only samples. It is known that IFN $\gamma$  upregulates PD-L1 on cells (97). First, looking at the non-tumorigenic MCF10A cell data, we also verified that IFN $\gamma$  stimulation upregulated IRF1, interferon regulatory factor, and PD-L1 (CD274 gene) levels, with no expression in the EGF only case in the LINCS RPPA data (Fig. 4b). Next, we identified a set of nine genes (IFNG, IFNGR1, IFNGR2, STAT1, STAT3, JAK1, JAK2, IRF1, IRF9) from the canonical IFN $\gamma$  pathway (REACTOME R-HSA-877300) and filtered the connections of the genes together with PD-L1 (CD274) and PD-1 (CD279) from IFNG-IAN (Fig. 4c). The resulting sub-network had 297 nodes and 321 edges (Fig. 4d, Supplementary Data 6 and 7). The hubs in that sub-network were from the input gene list, including IRF1, STAT1, STAT3, and PD-L1. We examined the connections between IRF1 and PD-L1 (Fig. 4e) and identified a five-gene set of connectors: BST2, CLIC2, FAM83D, ACSL5, and HIST2H2AA3. The mRNA levels of these five



genes were elevated in the IFN $\gamma$ +EGF condition compared to PBS control and EGF-only samples (Fig. 4f). Of the five genes, we could not find any literature data for two connections (ACSL5 and HIST2H2AA3) and their relationships to IFN $\gamma$  and PD-L1 function. Therefore, studying these novel connection predictions may reveal further diagnostic and therapeutic targets for immunotherapy. Notably, the remaining three genes had strong literature data. BST2 was recently shown to be part of a gene signature for anti-CTLA4 response in melanoma (98). CLIC2 is co-expressed with PD-L1/PD-1 in breast cancer and is a biomarker candidate for favorable prognosis (99). And although not directly linked to IFN $\gamma$ /PD-L1 axis, FAM83D was shown to regulate cell growth and proliferation and was implicated as a prognostic marker in breast and gastric cancers (100–102). Moreover, its FAM83A isoform was shown to affect PD-L1 expression (103). Overall, the concordance of these findings with recent literature reinforces the notion that MOBILE-based nomination of novel interactions has biological value.

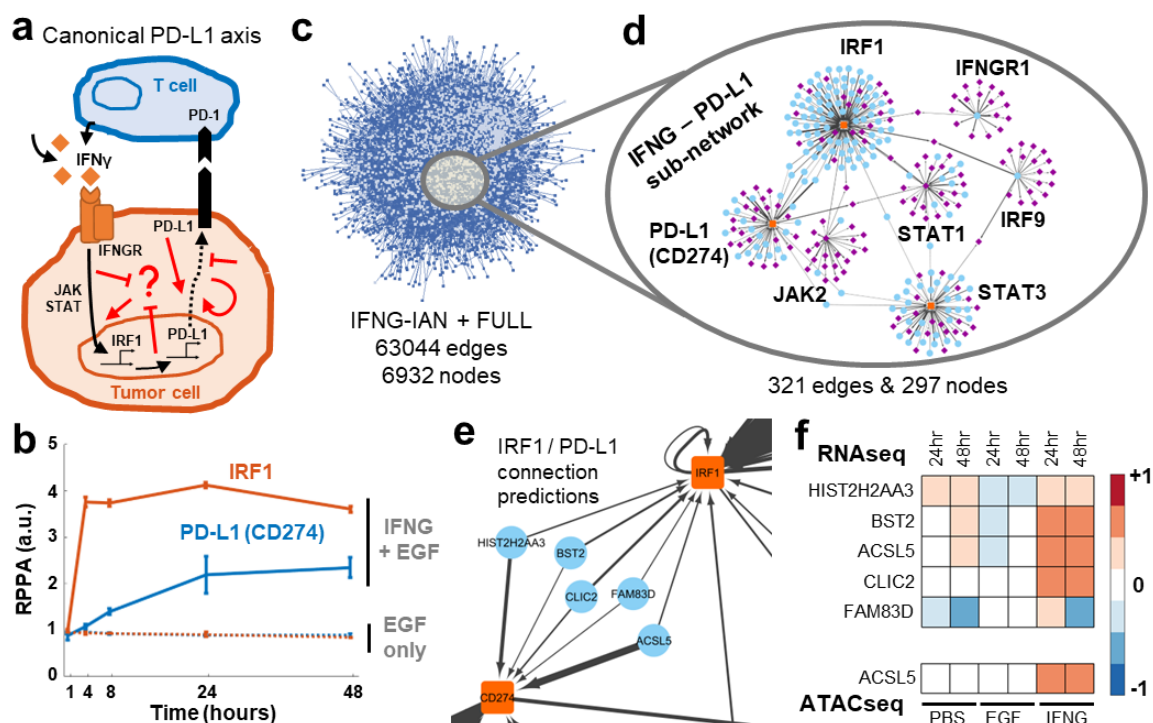

**Fig. 4 Exploration of single integrated association network reveals new links between IFN $\gamma$  signaling and PD-L1.** a IFN $\gamma$  secreted by T cells induces PD-L1 expression through JAK/STAT/IRF1 and other

canonical pathways (black arrows). The PD-L1 on the cell surface then interacts with PD-1 on the immune cells to induce tumor cell death. However, the PD-1/PD-L1 therapy yields inter- and intratumor heterogeneous response and there is a need to identify new non-canonical targets (represented by red arrows). **b** The IFN $\gamma$  induces IRF1 and PD-L1 production in MCF10A cells. **c** The IFNG associations network (IFNG-IAN) is a data-driven large-scale network of novel connections. The associations are coalesced into gene-level nodes, and associations with greater than 0.01 absolute value are shown. **d** The sub-network of IFN $\gamma$  – PD-L1 relationship is significantly smaller than the IFNG-IAN. The sub-network is generated by the filtering for 14 genes and has seven hubs (PD-L1 (CD274), IFNGR1, IRF1, IRF9, JAK2, STAT1, STAT3) connected to 290 other genes. Node colors represent; blue:RNAseq, purple:ATACseq, and orange:RPPA and the edge widths correlate with the magnitude of the association coefficients. **e** A closer look at the connections between IRF1 and PD-L1 (CD274) genes shows a breadth of different functional genes. **f** Compared to no or EGF-only stimulation, the connector genes are upregulated (RNAseq) in IFN $\gamma$  stimulated condition. Additionally, the ACSL5 gene peak is more accessible similarly to the canonical IFN $\gamma$  downstream genes (ATACseq). All data shown are from the pre-processed input.

## **TGF- $\beta$ superfamily members TGF $\beta$ 1 and BMP2 induce different morphological phenotypes via collagen-laminin signaling**

Both BMP2 and TGF $\beta$ 1 are members of the TGF- $\beta$  superfamily of ligands and share most downstream pathways including canonical SMAD signaling (104,105). Both ligands induce cell differentiation and show anti-growth/anti-proliferative effects, where SMAD signaling shows immense versatility and specificity, mostly affected by the cross-talk mechanisms and the cellular context (104–112).

Imaging data of cells grown on collagen-coated culture plates from LINCS (67) indicated that BMP2 induces a significantly higher number of cells in clusters compared to that induced by TGF $\beta$ 1 (Fig. 5a, top). Correspondingly, TGF $\beta$ 1 induced morphologically larger cells (113,114) that occupy more surface area (Fig. 5a, bottom). So, we used the ligand-specific IANs (Supplementary Fig. 3) and subsequent pathway enrichment analyses to find non-canonical mechanisms that underly the differential phenotypes caused by these two highly similar ligands. We ranked the nodes of the TGF $\beta$ 1 and BMP2 IANs (Supplementary Data 8 and 9) based on the sum of edge weights entering that node (Supplementary Data 10 and 11) and ran GSEA on these pre-ranked gene-lists (73,115). We then looked for curated Reactome pathways (74) significantly enriched ( $p < 0.05$  and  $FDR < 0.1$ ) in either gene-list (TGF $\beta$ 1 or BMP2 IAN genes) (Fig. 5b). Seven of the



enriched pathways under BMP2 and TGF $\beta$ 1 treatment conditions are shared (Fig. 5c gray circles, and Supplementary Data 12 and 13). The shared pathways are all cell cycle and proliferation related. Multiple pathways are specific to a single condition (Fig. 5b, BMP2: purple and TGF $\beta$ 1: gold). BMP2 enriched pathways include DNA regulation and G1/S transition. The TGF $\beta$ 1-only group had DNA damage and ECM regulation-related clusters of pathways. The laminin interactions (REACTOME R-HSA-3000157) pathway was significant among those that were ECM-related. Laminins are a family of proteins that regulate cell-to-cell and cell-to-environment interactions (116–121). It is known that laminins bind to collagen (122), integrin receptors (123), and depletion of ECM laminin or collagen disrupts the cellular attachment (116,124). Differential regulation of such a pathway might explain the phenotypic differences of TGF $\beta$ 1 and BMP2 phenotypes and offer a candidate mechanism to explore further for enlarged (more spreading and stretching) cells specific to the TGF $\beta$ 1 response. Specifically, that only TGF $\beta$ 1 induces laminin gene expression that then interacts with the collagen-coating of the culture plate, which induces tighter cell-to-cell and cell-to-ECM interactions.

Next, to initially confirm the activity of the laminin pathway under TGF $\beta$ 1 but not BMP2 stimulation, we referred back to the mRNA levels (the MOBILE input data) of the laminin interactions pathway genes (Fig. 5c) and saw TGF $\beta$ 1-upregulated transcription compared to BMP2. The mRNA levels of laminin, collagen, and integrin subunits were elevated at 24 and 48 hours (Fig. 5c, left), and corresponding transcription binding sites were more accessible in TGF $\beta$ 1 stimulated cells (Fig. 5c, ATACseq data, right).

In the original dataset, cells were cultured and treated on collagen-coated plates (67) and both ligands inhibited cell proliferation compared to EGF-only control (Fig. 5d, left panel). Additionally, BMP2 induced more cells in clusters compared to TGF $\beta$ 1 (Fig. 5d, middle panel) but TGF $\beta$ 1 was shown to cause significantly larger distances to second nearest neighbors (Fig. 5d, right panel). To test the hypothesis that TGF $\beta$ 1-specific phenotypes depend on activation of laminin-collagen

(in ECM) interactions (Fig. 5e), we cultured cells on non-collagen-coated plates and stimulated them with TGF $\beta$ 1 or BMP2 (+EGF, as done in the LINCS dataset (67)). Removal of the collagen caused a reversal of TGF $\beta$ 1-induced phenotype. We saw that the number of cells per cluster as well as cell centroid distances to second nearest neighbors are similar in BMP2 and TGF $\beta$ 1 stimulated cells in the absence of collagen-coating (Fig. 5d, middle and right panels). Overall, these analyses confirmed that MOBILE identified a context-specific network that explains differential phenotype between two highly similar ligands.

Finally, although MOBILE analysis identified the laminin pathway as potentially explanatory for differential phenotype, we wondered whether such a conclusion could be reached by standard differential expression analysis. Considering the same list of pre-filtered 3062 transcripts that were input to the MOBILE pipeline, we determined BMP2 or TGF $\beta$ 1 up and down regulated genes at 24- or 48-hour conditions. Next, we ranked the genes based on the fold-change (BMP2 vs TGF $\beta$ 1 or TGF $\beta$ 1 vs BMP2) and, similar to post-MOBILE enrichment analysis, we ran GSEA on these pre-ranked lists of genes (Supplementary Data 14). We then compared MOBILE results with the differential expression analysis results. The BMP2 up-regulated, TGF $\beta$ 1 up-regulated, BMP2 down-regulated, and TGF $\beta$ 1 down-regulated gene lists alone did not yield any significant pathway enrichments ( $p < 0.05$  and  $FDR < 0.1$ ). However, we obtained a single significantly enriched pathway (REACTOME Extracellular Matrix Organization, R-HSA-1474244) when we looked at the combined list of TGF $\beta$ 1 up- and down-regulated genes. The combined BMP2 regulated gene list yielded 10 significantly enriched pathways including ECM Organization (Supplementary Data 15), whereas the MOBILE pipeline yielded 39 (TGF $\beta$ 1, Supplementary Data 12) and 20 (BMP2, Supplementary Data 13) enriched pathways using TGF $\beta$ 1- and BMP2-specific IANs. In summary, we conclude that the MOBILE inferred ligand-specific association networks and their analyses extract more information on the differential pathway enrichments compared to standard methods.

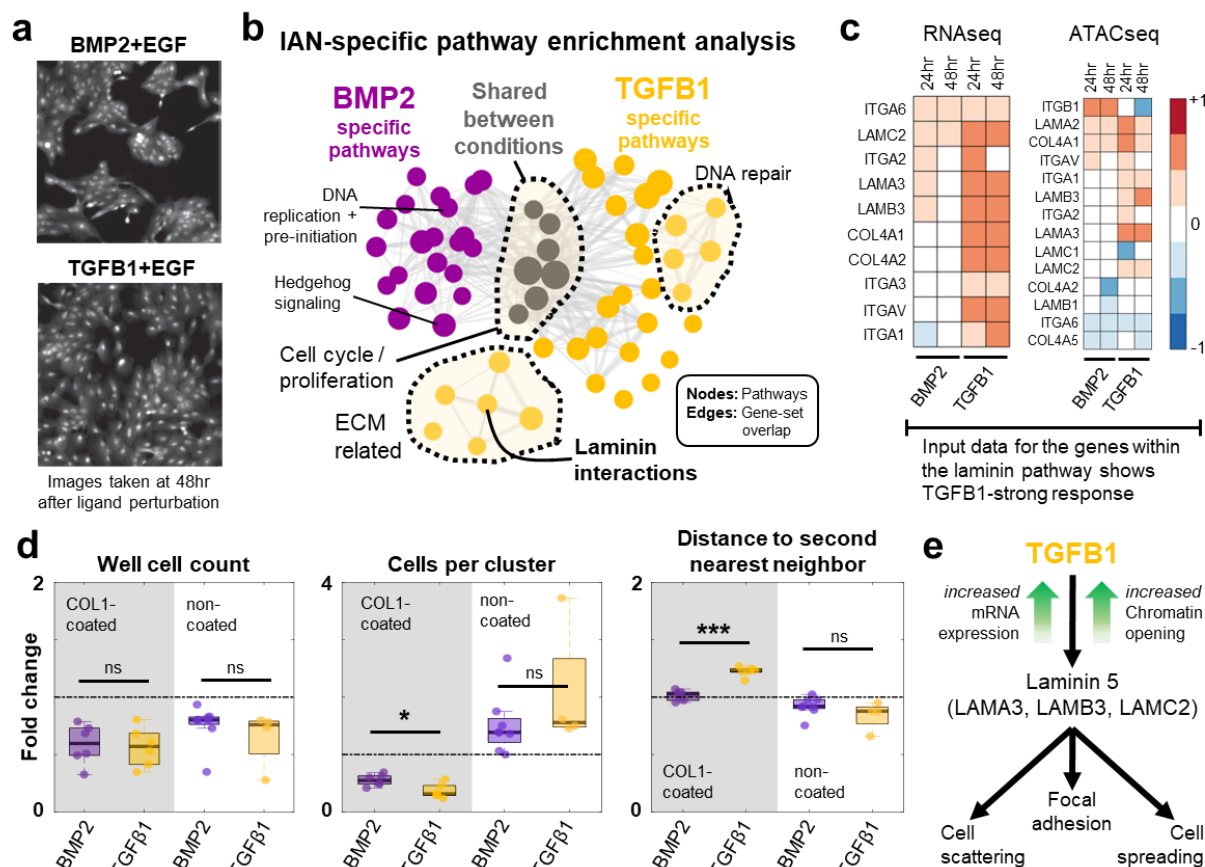

**Fig. 5 TGFβ1 and BMP2 induce different morphological phenotypes by differentially activating collagen-laminin signaling.** **a** TGFβ1 and BMP2 induce phenotypically different responses as seen in the immunofluorescence images 48 hour after ligand treatment (adapted from (67)) **b** The ranked gene lists of the ligand-specific (TGFβ1 or BMP2) networks are used to find enriched lists of curated Reactome pathways. Both conditions are enriched in cell cycle and proliferation related pathways (gray circles). TGFβ1 alone is shown to regulate ECM related pathways whereas BMP2 network genes are linked to other membrane receptor related signaling pathways and cell cycle checkpoints. Node size is proportional to the enrichment scores and edge widths represent the number of overlapping genes within the connected pathways. **c** The laminin pathway regulates cell-to-cell and ECM adhesion of cells and is shown to be upregulated by TGFβ1 alone. The expression levels of the genes (left) within the pathway are upregulated by TGFβ1. The gene regions (peaks, right panel) of the laminin genes are more accessible in TGFβ1 condition. Laminin 5 is the major secreted complex consisting of LAMA3, LAMB3, and LAMC2. Transcriptomic and epigenomic data shown are from the pre-processed input. **d** Quantification of the images in (a) shows that both BMP2 (purple) and TGFβ1 (gold) induce similar anti-growth responses but yield significantly different microenvironmental and spatial characteristics. The metrics shown are normalized to the mean of EGF-only treatments at 48 hours (black dashed line), where both ligands inhibit cell proliferation and cause less number of cells (cell counts, left box plot, shaded region). However, BMP2 induced larger number of cells in clusters compared to TGFβ1 (middle box plot, shaded region, p-value = 0.0175). TGFβ1, on the other hand, caused cells spread and have longer distance to their second nearest neighbors (right box plot, shaded region, p-value = 9.4032E-06). To confirm MOBILE predicted effect of collagen-laminin interactions for such differences in ligand responses, we performed validation experiments where cells are grown in non-collagen-coated, regular tissue-culture treated plates. The results show phenotype reversal of cells-per-cluster and distance-to-second-neighbor (unshaded regions, middle and right box plots), with non-significant differences between BMP2 and TGFβ1. The box edges correspond to 25<sup>th</sup>-75<sup>th</sup> percentiles, the horizontal black lines represent the median, and the dots are individual data points.

423 The whiskers extend to the extreme (non-outlier) data points. ns: not significant (p-value > 0.05). \*  
 424 represents p-value < 0.05, \*\*\* p-value < 0.001. Significance tested using Student's t-test with unequal  
 425 variance and both tails. **e** The schematic of TGFβ1 specific regulation of a non-SMAD pathway, inferred by  
 426 the MOBILE Integrator pipeline. TGFβ1 induces laminin pathway gene expression and leads to cell  
 427 scattering and cell spreading with larger cells, when compared to BMP2 stimulation.

## Discussion

Moving away from the single modality analysis of “multi-omics” datasets, data integration methods are becoming more widely available due to their ability to extract multi-scale information (i.e., genomic to proteomic). Some data integration methods are exclusively based on prior-pathway knowledge, while others utilize such knowledge to infer human-interpretable associations. Here we introduced the MOBILE pipeline to integrate and analyze multi-omics datasets in a data-driven way. With a central-dogmatic hierarchy, the method finds statistically robust integrated association networks (IANs) between epigenomic, transcriptomic, and proteomic analytes that is ultimately human interpretable. We explored ligand-specific IANs obtained via leave-one-group-out (LOGO) analysis— for non-canonical connections with novel immunotherapeutic potential and differentially activated pathways to discriminate between highly similar ligand-receptor responses.

The MOBILE pipeline can prioritize context-specific, differentially activated pathways and mechanisms. The pipeline finds statistical associations where the LOGO analysis is the part that provides context-specificity. By holding out data from each ligand one at a time (24- and 48-hour time points), associations that depend on the held-out data are inferred and cataloged as ligand-dependent. These ligand-dependent associations are the core of MOBILE integrator, enabling exploration of single ligand-specific and differentially enriched pathways between multiple ligand conditions. We expect that the exact method used for forming statistical associations (replicated LASSO) is not particularly essential, and other methods may be substituted so long as it is robust and can make use of the information in the datasets (10,24,28,30,44–46). However, by imposing matching time points, we miss time-lagged associations between mRNAs and proteins due to their temporal ordering. Thus, a next step for the MOBILE pipeline could be to become more flexible with respect to different time points for different assays and fully exploit temporal dependence information for inference of associations.

The above-mentioned matching column order for input matrices requirement of the MOBILE pipeline in this work does not restrict users to study only time points x ligand conditions. For instance, Erdem et al. showed that paired input data matrix pairs at different time points (rows: proteomic measurements, columns: different cell lines) could infer robust, time-dependent associations between proteins and phospho-proteins (37). Another way to utilize the MOBILE pipeline is to find cell line-specific association networks by considering datasets like Cancer Cell Line Encyclopedia (CCLE), where hundreds of cell lines were characterized with molecular and functional assays (2,125). MOBILE could be set up where columns represent different cell lines, and the matrix pair are proteomic and transcriptomic data. By imposing different higher-level hierarchies for the MOBILE pipeline, researchers can explore different types of context-specificity by using data from either single or multiple assays.

Nevertheless, the lists of associations generated by MOBILE are all data-driven experimental candidates to study ligand-specific linkages between genes and gene products. Especially, the highest magnitude associations could be starting points for new experiments to explore crosstalk mechanisms or unknown links in the literature. For instance, by analyzing the IFN $\gamma$ -specific network only, we hypothesized new regulatory mechanisms of PD-L1, a critical immunotherapeutic target. Of the five MOBILE-hypothesized connector genes (BST2, CLIC2, FAM83D, ACSL5, and HIST2H2AA3) between IRF1 and PD-L1, BST2 was recently recognized as part of an immune/tumor related signature that is significantly associated with the overall survival of skin cancer patients (98). Specifically, the BST2 gene signature predicted response to a CTLA4 antibody called ipilimumab, suggesting a mechanistic involvement in tumor progression. Secondly, CLIC2 was shown to be co-expressed with PD-L1 and PD-1 and act as a good prognosis marker with higher rates of tumor-infiltrating CD8 $^{+}$  T cells in breast cancer patients (99). Finally, FAM83D was shown to be a potential oncogene with high expression levels associated with poor breast cancer prognosis (100). Moreover, FAM83A (an isoform of FAM83D)

was shown to drive PD-L1 expression and be correlated with poor lung cancer prognosis (103). These results suggest that context-specific gene-gene associations identified through MOBILE are potential biomarkers for prognosis and patient response to immune checkpoint inhibition.

Another key capability of MOBILE pipeline is the IAN-comparative analysis. For instance, we hypothesized and then experimentally validated that the phenotypic differences between TGF $\beta$ 1 and BMP2 perturbations were caused by cell-ECM interactions, specifically laminin-collagen. When we replicated LINCS experimental conditions in tissue culture plates without collagen coating, the two ligands induced similar responses (Fig. 5d), where both ligands were previously known to induce cell differentiation, inhibit cell proliferation, and signal through similar canonical pathways (105–107). Additionally, it was shown before that laminin/collagen pathway inhibition leads to cell-ECM attachment disruption (116,124). However, there are other TGF $\beta$ 1-specific ECM-related pathways (Fig. 5b) and genes that could be further explored for differences between BMP2 and TGF $\beta$ 1 conditions. Similarly, studying other ligand-IAN pairs (e.g., EGF vs HGF, IFN $\gamma$  vs TGF $\beta$ 1, OSM vs IFN $\gamma$ ) could suggest additional data-driven hypotheses.

The MOBILE pipeline here infers robust associations between genes and genes products without prior network knowledge input, enables generation of context-specific, gene-level networks of different biological modalities in a data-driven way, and provides exploration of these networks in a single or paired fashion to pinpoint differentially activated pathways. We believe the freely-available MOBILE pipeline will be broadly helpful in extracting novel context-specific insights from multi-omics datasets to help answer targeted biological questions.



# Methods

## Computational methods

### *The Lasso module*

The multi-omics datasets from the LINCS consortium (67) are pre-processed using a raw variance filter to retain only 10% (RNAseq, ATACseq) and 20% (RPPA) highly variant analyte measurements across median summarized Level 4 data (Fig. 2a, synapse.org/LINCS\_MCF10A, Source Data). The proteomic (RPPA), transcriptomic (RNAseq), and epigenetic (ATACseq) datasets are integrated with a central dogmatic view, such that pairs of RPPA+RNAseq and RNAseq+ATACseq data matrices are run through the Lasso module (Fig. 2b-d). The steps of the algorithm (37) are:

1. We use `glmnet` package for lasso regression (126). The module takes two input matrices,  $Y$ =left hand side and  $X$ =right hand side, and our goal is to calculate matrix  $\beta$  in  $Y = \beta \cdot X + \delta$ . The number and the ordering of columns in input matrices should be equal (Fig. 2b). The rows are assay analytes measured and columns represent ligand/timepoint conditions.
2. The matrices are column centered, row-centered, and row normalized. The preprocessing makes sure that the algorithm is not biased towards high magnitude analyte measurements but focused on analyzing based on the shape of measurements across conditions. It also sustains that the offset value is moved towards zero.
3. We set cross-validation parameter of `glmnet` package to 4 and turned-off the input data standardization option.
4. Next, both matrices are transposed and the transposed  $Y$  matrix ( $Y'$ ) is separated into column vectors.
5. For each column  $k$  of the  $Y'$  (or each row of input matrix  $Y$ ), a set of lasso regression coefficients are calculated using `glmnet` package. With every iteration, we obtain one row of



the final coefficient matrix  $\beta$  and an offset value  $\delta$ , which is negligible in this case (values less than  $10^{-7}$ ). We minimize the quantity:

$$\sum_{i=1}^C [Y_{ki} - \sum_{j=1}^R \beta_{kj} X_{ji} - \delta_k]^2 + \lambda \sum_{j=1}^R |\beta_{kj}| \quad (\text{Equation 1})$$

**6.** The  $\lambda$  factor (Eqn. 1) is estimated via the inherent cross-validation step of the glmnet package.

In short, a set of different  $\lambda$  values are tested resulting in different sets of lasso coefficients, each with potentially different number of non-zero coefficients.

**7.** We select the set of lasso coefficients (i.e., the lasso coefficient vector) corresponding to the minimum estimation error.

**8.** Repeating steps 5-7 as many times as the number of input Y rows, we obtain R-many Lasso coefficient vectors, each R2-long.

**9.** We concatenate the R-many R2-long vectors to obtain a Lasso coefficient matrix.

**10.** We repeat the (3-9) steps 10000 times to obtain an ensemble of Lasso coefficient matrices.

We start each estimation with a different seed for random number generator.

**11.** We then find coefficient indices that appear at least half of the time (5000 times) and select the matrix with highest number of such coefficients. This matrix is called the Robust Lasso coefficient matrix and used for the rest of the analyses.

**12.** The final matrix ( $\beta$ ) sustains the equality  $Y = \beta \cdot X$  and contains association weights relating the analyte levels of the two input matrices.

**13.** When the input data contains all experimental conditions, we named the resulting robust Lasso coefficient matrix as the FULL-data matrix.

**14.** We do steps 1-13 for (i) RPPA (matrix Y)-RNAseq (matrix X) and (ii) RNAseq (matrix Y)-ATACseq (matrix X) input data matrix pairs.

15. To show that the inferred coefficients are non-random, we repeated the above steps for sets of shuffled input matrices, using Matlab (R2018a) `randperm` function. We saw that the randomized input matrices result in significantly smaller number of coefficients inferred (Supplementary Fig. 4). We used the `kstest2` function in Matlab to test for the significance in the differences (Kolmogorov-Smirnov distances) between real and shuffled conditions. We obtained p-values = 0 for all comparisons, indicating that the real input has more information content and thus require more coefficients to explain the data.

### *The LOGO module*

In addition to the Lasso module, we employ the leave-one-group-out (LOGO) module (Fig. 2d) to obtain a new robust Lasso coefficient matrix of each perturbation in the input dataset. Here, the perturbations are ligand combinations used. We create a ligand-specific matrix by excluding that ligand condition during the model run and comparing the resulting matrix to FULL-data robust Lasso coefficient matrix to determine the coefficients depend on the existence of the corresponding ligand data. We apply LOGO module for both RPPA-RNAseq and RNAseq-ATACseq input pairs. Similar in principle to cross-validation, the LOGO module here enabled us not just to integrate given datasets but to acquire ligand-specific associations.

### *The integration*

When both proteomic-transcriptomic and transcriptomic-epigenetic robust Lasso coefficient matrices are obtained, they are merged into a single, gene-level network (Fig. 2c). This network representation is named the Integrated Associations Network (IAN), where each node is a gene, and edge weights represent the Lasso coefficient magnitudes. Notably, the gene nodes can represent data from one or more RPPA, RNAseq, or ATACseq sets. Summarizing the networks at the gene level enabled us to explore pathway enrichments using GSEA (73).

## GSEA and pathway enrichments

Using the Lasso+LOGO modules and excluding one ligand condition out at a time, we obtain seven LOGO IANs (PBS, EGF, HGF, OSM, IFN $\gamma$ , TGF $\beta$ 1, and BMP2) in addition to the FULL-data network. We compare each ligand network with the FULL-data network to determine ligand-dependent associations and create gene-level network visuals using Cytoscape (127). Next, we calculate the weighted sum of edge weights for each gene node in the networks and rank them (Fig. 2e). Then, we run pathway enrichment analysis using GSEA (73) and Reactome to obtain a list of curated pathways enriched for each network (i.e., ligand-LOGO condition).

We calculate the gene-level weight  $\alpha$  for each gene  $k$  (Equation 2) by summing over each edge width and normalizing by the total number of possible edges.

$$\alpha_{gene_k} = \frac{|\sum_{j=1}^{3062} \sum_{i=1}^{59} \beta_{ij}|_{RPPA\_RNAseq} + |\sum_{j=1}^{3062} \sum_{i=1}^{9321} \beta_{ij}|_{RNAseq\_ATACseq}}{59 \cdot 3062 \cdot 9321} \quad (\text{Equation 2})$$

The ranked gene lists are then imported into GSEA software (version 4.1.0) and used in the GSEAPreranked analysis. We select Reactome (v7.2) as the gene set database, keep the default 1000 permutations option, and keep dataset as is without collapsing the gene symbols since we already use the HGNC identifiers. We also choose classical weighting option and choose “149” as our seed for permutation for reproducibility. We repeat these steps for every ligand-specific ranked gene list from the ligand-specific IANs.

After the enrichment analysis successfully completes, we use Enrichment Map Visualization tool of GSEA, together with Cytoscape (v3.7.1). We only retain pathways enriched with a p-value less than 0.05 and false discovery rate (FDR) of 0.1. The results for BMP2 and TGF $\beta$ 1 are given in Supplementary Data 12 and 13. For this comparison we only retain coefficients with magnitudes larger than 0.1.

## Experimental methods

### *Cell culture*

MCF10A cells (ATCC #CRL-10317, acquired from LINCS Consortium/Gordon Mills and STR verified internally in March 2019) are cultured in DMEM/F12 (Gibco #11330032) medium supplemented with 5% (by volume) horse serum (Gibco #16050122), 20ng/mL EGF (PeproTech #AF-100-15), 0.5 mg/mL hydrocortisone (Sigma #H-0888), 10µg/mL insulin (Sigma #I-1882), 100ng/mL cholera toxin (Sigma #C-8052), and 2mM L-Glutamine (Corning #25-005-CI). Cells were cultured at 37°C in 5% CO<sub>2</sub> in a humidified incubator and passaged every 2-3 days with 0.25% trypsin (Corning #25-053-CI) to maintain subconfluency. Experimental starvation medium is DMEM/F12 medium supplemented with 5% (by volume) horse serum (Gibco #16050122), 0.5 mg/mL hydrocortisone (Sigma #H-0888), 100ng/mL cholera toxin (Sigma #C-8052), and 2mM L-Glutamine (Corning #25-005-CI).

### *Mycoplasma testing*

The cells were tested for Mycoplasma using a detection kit (Lonza #LT07-701). Following the manufacturer protocol, growth media (2mL) from culture plate was spun at 200g for 5 minutes and 100 µL from the cleared supernatant was transferred into a well of a 96-well plate. 100 µL testing Reagent was added into the same well and let settle for 5 min. Then luminescence is measured in Synergy H1 microplate reader (Agilent Technologies, Inc., CA, USA) with Gen5 (v3.08) software. The Gain was set to 200, Integration time to 1 second, and a single reading was captured. Then, the plate is returned under the hood and 100 µL of testing Substrate was added into the same well. The plate was let settle for 10 min at room temperature. Then, the second luminescence reading (cell supernatant, Reagent, and Substrate) was taken with the same parameters. A ratio of less than 1 indicates a negative test.

## *Validation experiments*

The cells were seeded in full growth media at 2000 cells/well in tissue culture treated (no collagen-coating) 96-well plates (Falcon #353072). After loading, plates were left to settle under the hood for 30 minutes and then placed in the incubator for 10 hours. Next, the media is exchanged to experimental starvation media for 15 hours. Then, media are replaced with fresh experimental media containing the ligand(s): EGF (10 ng/mL, R&D Systems #236-EG), BMP2 (20 ng/ml, R&D Systems #355-BM) + EGF (10 ng/ml), and TGF $\beta$ 1 (10 ng/ml, R&D Systems #240-B) + EGF (10 ng/ml). Each condition was repeated in triplicate. The plates are incubated for ~48 hours. The cells are fixed using %2 paraformaldehyde (Alfa Aesar #43368) and stained with Hoechst (1:10000, by volume, BD Biosciences #561908) for nucleus localization. The plate was left for 1 hour at room temperature. The wells are washed once with 1X PBS and replenished with 40  $\mu$ l/well PBS.

## *Imaging*

The plates are imaged at 10X magnification with phase contrast objective (Agilent/BioTek part number 1320516) and TagBFP filter cube (Agilent/BioTek part number 1225115, excitation 390nm, emission 447nm). A total of 10x8 fields of view per well? are imaged with laser autofocus on the Cytation5 (Agilent Technologies, Inc., CA, USA). When reading was done, the tiles were montaged together by the Gen5 (v3.04, Agilen/BioTeK) software using phase contrast images as registration template (fusion method=linear blend, final image reduction to 13.71%). The imaging parameters for phase contrast were LED=10, Integration time=8, and Gain=24. The parameters for the TagBFP channel were LED=10, Integration time=36, and Gain=24.

## *Image processing and quantification*

The images are processed for cell segmentation and finding cell centroids. In short, TrackMate (v7.1.0) plugin from ImageJ (v2.3.0/1.53f) is used to locate cell nuclei in each image (Hoechst stain + BFP channel, see Source Data) and the summary was exported as a comma separated

file (see Source Data). The parameters for the plugin were Detector=LoG, Estimated object diameter=5 pixels, Quality threshold=0, Pre-process with median filter=ON, Sub-pixel localization=ON, and Initial thresholding=Auto.

### *Spatial and microenvironmental metric calculations*

The csv files exported by ImageJ included each cell object as a row and reported its center coordinates with other default information. The files were imported, and the cells-per-cluster and distance-to-neighbors metrics were evaluated using R scripts (Source Data, [github.com/cerdem12/MOBILE](https://github.com/cerdem12/MOBILE)), adapted from ([github.com/MEP-LINCS/MDD/blob/master/R/MDD\\_Immunofluorescence\\_Lvl0Data\\_Processing.R](https://github.com/MEP-LINCS/MDD/blob/master/R/MDD_Immunofluorescence_Lvl0Data_Processing.R) (67)).

### **Code Availability**

The final model scripts, files, and information are available at [github.com/cerdem12/MOBILE](https://github.com/cerdem12/MOBILE).

### **Data Availability**

The LINCS datasets analyzed during the current study are available in the Synapse repository, [synapse.org/LINCS\\_MCF10A](https://synapse.org/LINCS_MCF10A) (67,128). Source Data are provided with this paper at doi:10.6084/m9.figshare.20294229.

### **Author Contributions**

Conceptualization, C.E. and M.R.B.; Methodology, C.E., S.M.G., L.M.H., and M.R.B.; Software, C.E.; Validation: C.E. and M.R.B.; Formal analysis: C.E.; Investigation: C.E., S.M.G., and L.M.H.; Resources: L.M.H. and M.R.B.; Data curation: C.E. and S.M.G.; Writing – Original Draft: C.E. and M.R.B.; Writing – Review & Editing: C.E. and M.R.B.; Visualization: C.E. and S.M.G.; Supervision: L.M.H. and M.R.B.; Project administration: C.E., L.M.H, and M.R.B.; Funding acquisition: L.M.H. and M.R.B.

## 658 **Competing Interests**

659 The authors declare no competing interests.

## 660 **Acknowledgments**

661 The authors acknowledge funding from the National Institutes of Health Grants R01GM104184  
 662 (M.R.B.), 1R35GM141891 (M.R.B.), U54HG008098-LINCS Center (M.R.B.), U54CA209988  
 663 (L.M.H.), and U54HG008100-LINCS Center (L.M.H.). C.E. was an NIH-LINCS Postdoctoral  
 664 Fellow.

# References

1. Koboldt DC, Fulton RS, McLellan MD, Schmidt H, Kalicki-Veizer J, McMichael JF, et al. Comprehensive molecular portraits of human breast tumours. *Nature*. 2012;490:61–70.
2. Nusinow DP, Szpyt J, Ghandi M, Rose CM, McDonald ER, Kalocsay M, et al. Quantitative Proteomics of the Cancer Cell Line Encyclopedia. *Cell*. 2020 Jan;180(2):387-402.e16.
3. Barrett T, Wilhite SE, Ledoux P, Evangelista C, Kim IF, Tomashevsky M, et al. NCBI GEO: archive for functional genomics data sets—update. *Nucleic Acids Res*. 2012 Nov 26;41(D1):D991–5.
4. Edwards NJ, Oberti M, Thangudu RR, Cai S, McGarvey PB, Jacob S, et al. The CPTAC Data Portal: A Resource for Cancer Proteomics Research. *J Proteome Res*. 2015 Jun 5;14(6):2707–13.
5. Stathias V, Turner J, Koletti A, Vidovic D, Cooper D, Fazel-Najafabadi M, et al. LINCS Data Portal 2.0: next generation access point for perturbation-response signatures. *Nucleic Acids Res*. 2020 Jan 8;48(D1):D431–9.
6. Thul PJ, Åkesson L, Wiking M, Mahdessian D, Geladaki A, Ait Blal H, et al. A subcellular map of the human proteome. *Science*. 2017 May 26;356(6340):eaal3321.
7. Davis CA, Hitz BC, Sloan CA, Chan ET, Davidson JM, Gabdank I, et al. The Encyclopedia of DNA elements (ENCODE): data portal update. *Nucleic Acids Res*. 2018 Jan 4;46(D1):D794–801.
8. Dolinski K, Troyanskaya OG. Implications of Big Data for cell biology. Kozminski KG, editor. *Mol Biol Cell*. 2015 Jul 5;26(14):2575–8.
9. Yao V, Wong AK, Troyanskaya OG. Enabling Precision Medicine through Integrative Network Models. *J Mol Biol*. 2018 Sep;430(18):2913–23.
10. Martorell-Marugán J, Tabik S, Benhammou Y, del Val C, Zwir I, Herrera F, et al. Deep Learning in Omics Data Analysis and Precision Medicine. In: Division of Biomedical Science, University of the Highlands and Islands, UK, Husi H, editors. *Computational Biology [Internet]*. Codon Publications; 2019 [cited 2021 Sep 20]. p. 37–53. Available from: <https://exonpublications.com/index.php/exon/article/view/218>
11. Sealfon RSG, Wong AK, Troyanskaya OG. Machine learning methods to model multicellular complexity and tissue specificity. *Nat Rev Mater*. 2021 Aug;6(8):717–29.
12. Park M, Kim D, Moon K, Park T. Integrative Analysis of Multi-Omics Data Based on Blockwise Sparse Principal Components. *Int J Mol Sci*. 2020 Nov 2;21(21):8202.
13. Jensen KJ, Janes KA. Modeling the latent dimensions of multivariate signaling datasets. *Phys Biol*. 2012 Aug 1;9(4):045004.
14. Kreeger PK. Using Partial Least Squares Regression to Analyze Cellular Response Data. *Sci Signal*. 2013 Apr 16;6(271):tr7–tr7.



15. Lê Cao KA, Rossouw D, Robert-Granié C, Besse P. A Sparse PLS for Variable Selection when Integrating Omics Data. *Stat Appl Genet Mol Biol* [Internet]. 2008 Jan 18 [cited 2021 Sep 20];7(1). Available from: <https://www.degruyter.com/document/doi/10.2202/1544-6115.1390/html>
16. de Souto MC, Costa IG, de Araujo DS, Ludermir TB, Schliep A. Clustering cancer gene expression data: a comparative study. *BMC Bioinformatics*. 2008 Dec;9(1):497.
17. Wiwie C, Baumbach J, Röttger R. Comparing the performance of biomedical clustering methods. *Nat Methods*. 2015 Nov;12(11):1033–8.
18. Oyelade J, Isewon I, Oladipupo F, Aromolaran O, Uwoghien E, Ameh F, et al. Clustering Algorithms: Their Application to Gene Expression Data. *Bioinforma Biol Insights*. 2016 Jan;10:BBI.S38316.
19. Abu-Jamous B, Kelly S. Clust: automatic extraction of optimal co-expressed gene clusters from gene expression data. *Genome Biol*. 2018 Dec;19(1):172.
20. Liu W, Payne SH, Ma S, Fenyö D. Extracting Pathway-level Signatures from Proteogenomic Data in Breast Cancer Using Independent Component Analysis. *Mol Cell Proteomics*. 2019 Aug;18(8):S169–82.
21. Soinov LA, Krestyaninova MA, Brazma A. Towards reconstruction of gene networks from expression data by supervised learning. *Genome Biol*. 2003;4(1):R6.
22. Shipp MA, Ross KN, Tamayo P, Weng AP, Kutok JL, Aguiar RCT, et al. Diffuse large B-cell lymphoma outcome prediction by gene-expression profiling and supervised machine learning. *Nat Med*. 2002 Jan;8(1):68–74.
23. van 't Veer LJ, Dai H, van de Vijver MJ, He YD, Hart AAM, Mao M, et al. Gene expression profiling predicts clinical outcome of breast cancer. *Nature*. 2002 Jan;415(6871):530–6.
24. Zhang L, Lv C, Jin Y, Cheng G, Fu Y, Yuan D, et al. Deep Learning-Based Multi-Omics Data Integration Reveals Two Prognostic Subtypes in High-Risk Neuroblastoma. *Front Genet*. 2018 Oct 18;9:477.
25. Choi H, Pavelka N. When one and one gives more than two: challenges and opportunities of integrative omics. *Front Genet*. 2011;2:105.
26. Buescher JM, Driggers EM. Integration of omics: more than the sum of its parts. *Cancer Metab*. 2016 Dec;4(1):4.
27. Huang S, Chaudhary K, Garmire LX. More Is Better: Recent Progress in Multi-Omics Data Integration Methods. *Front Genet*. 2017 Jun 16;8:84.
28. Oh M, Park S, Kim S, Chae H. Machine learning-based analysis of multi-omics data on the cloud for investigating gene regulations. *Brief Bioinform*. 2021 Jan 18;22(1):66–76.
29. Kawata K, Hatano A, Yugi K, Kubota H, Sano T, Fujii M, et al. Trans-omic Analysis Reveals Selective Responses to Induced and Basal Insulin across Signaling, Transcriptional, and Metabolic Networks. *iScience*. 2018 Sep;7:212–29.

- 739 30. Dugourd A, Kuppe C, Sciacovelli M, Gjerga E, Gabor A, Emdal KB, et al. Causal  
740 integration of multi-omics data with prior knowledge to generate mechanistic hypotheses.  
741 Mol Syst Biol [Internet]. 2021 Jan [cited 2021 Sep 17];17(1). Available from:  
742 <https://onlinelibrary.wiley.com/doi/10.15252/msb.20209730>
- 743 31. Ma T, Zhang A. Integrate multi-omics data with biological interaction networks using  
744 Multi-view Factorization AutoEncoder (MAE). BMC Genomics. 2019 Dec;20(S11):944.
- 745 32. Sharifi-Noghabi H, Zolotareva O, Collins CC, Ester M. MOLI: multi-omics late integration  
746 with deep neural networks for drug response prediction. Bioinformatics. 2019 Jul  
747 15;35(14):i501–9.
- 748 33. Tuncbag N, Gosline SJC, Kedaigle A, Soltis AR, Gitter A, Fraenkel E. Network-Based  
749 Interpretation of Diverse High-Throughput Datasets through the Omics Integrator  
750 Software Package. Prlic A, editor. PLOS Comput Biol. 2016 Apr 20;12(4):e1004879.
- 751 34. Siddle K. Signalling by insulin and IGF receptors: supporting acts and new players. J Mol  
752 Endocrinol. 2011;47:R1-10.
- 753 35. Saltiel AR, Kahn CR. Insulin signalling and the regulation of glucose and lipid metabolism.  
754 Nature. 2001;414:799–806.
- 755 36. Pollak M. Insulin and insulin-like growth factor signalling in neoplasia (vol 8, pg 915,  
756 2008). Nat Rev Cancer. 2009;9:224.
- 757 37. Erdem C, Nagle AM, Casa AJ, Litzenburger BC, Wang Y fen, Taylor DL, et al. Proteomic  
758 Screening and Lasso Regression Reveal Differential Signaling in Insulin and Insulin-like  
759 Growth Factor I (IGF1) Pathways. Mol Cell Proteomics. 2016 Sep;15(9):3045–57.
- 760 38. Erdem C, Lee AV, Taylor DL, Lezon TR. Inhibition of RPS6K reveals context-dependent  
761 Akt activity in luminal breast cancer cells. Hall B, editor. PLOS Comput Biol. 2021 Jun  
762 30;17(6):e1009125.
- 763 39. Greene CS, Krishnan A, Wong AK, Ricciotti E, Zelaya RA, Himmelstein DS, et al.  
764 Understanding multicellular function and disease with human tissue-specific networks.  
765 Nat Genet. 2015 Jun;47(6):569–76.
- 766 40. Park C, Ahn J, Kim H, Park S. Integrative Gene Network Construction to Analyze Cancer  
767 Recurrence Using Semi-Supervised Learning. Csermely P, editor. PLoS ONE. 2014 Jan  
768 31;9(1):e86309.
- 769 41. Lewis JE, Kemp ML. Integration of machine learning and genome-scale metabolic  
770 modeling identifies multi-omics biomarkers for radiation resistance. Nat Commun. 2021  
771 Dec;12(1):2700.
- 772 42. Drake JM, Paull EO, Graham NA, Lee JK, Smith BA, Titz B, et al. Phosphoproteome  
773 Integration Reveals Patient-Specific Networks in Prostate Cancer. Cell. 2016  
774 Aug;166(4):1041–54.

- 775 43. Paull EO, Carlin DE, Niepel M, Sorger PK, Haussler D, Stuart JM. Discovering causal  
776 pathways linking genomic events to transcriptional states using Tied Diffusion Through  
777 Interacting Events (TieDIE). *Bioinformatics*. 2013 Nov;29(21):2757–64.
- 778 44. Park CY, Krishnan A, Zhu Q, Wong AK, Lee YS, Troyanskaya OG. Tissue-aware data  
779 integration approach for the inference of pathway interactions in metazoan organisms.  
780 *Bioinformatics*. 2015 Apr 1;31(7):1093–101.
- 781 45. Yao V, Kaletsky R, Keyes W, Mor DE, Wong AK, Sohrabi S, et al. An integrative tissue-  
782 network approach to identify and test human disease genes. *Nat Biotechnol*. 2018  
783 Nov;36(11):1091–9.
- 784 46. Basha O, Argov CM, Artzy R, Zoabi Y, Hekselman I, Alfandari L, et al. Differential  
785 network analysis of multiple human tissue interactomes highlights tissue-selective  
786 processes and genetic disorder genes. Wren J, editor. *Bioinformatics*. 2020 May  
787 1;36(9):2821–8.
- 788 47. Ideker T, Krogan NJ. Differential network biology. *Mol Syst Biol*. 2012 Jan;8(1):565.
- 789 48. Xie J, Yang F, Wang J, Karikomi M, Yin Y, Sun J, et al. DNF: A differential network flow  
790 method to identify rewiring drivers for gene regulatory networks. *Neurocomputing*. 2020  
791 Oct;410:202–10.
- 792 49. Gill R, Datta S, Datta S. A statistical framework for differential network analysis from  
793 microarray data. *BMC Bioinformatics*. 2010 Dec;11(1):95.
- 794 50. Lichtblau Y, Zimmermann K, Haldemann B, Lenze D, Hummel M, Leser U. Comparative  
795 assessment of differential network analysis methods. *Brief Bioinform*. 2016 Jul  
796 29;bbw061.
- 797 51. Jardim VC, Santos S de S, Fujita A, Buckeridge MS. BioNetStat: A Tool for Biological  
798 Networks Differential Analysis. *Front Genet*. 2019 Jun 21;10:594.
- 799 52. Goenawan IH, Bryan K, Lynn DJ. DyNet: visualization and analysis of dynamic molecular  
800 interaction networks. *Bioinformatics*. 2016 Sep 1;32(17):2713–5.
- 801 53. Bandyopadhyay S, Mehta M, Kuo D, Sung MK, Chuang R, Jaehnig EJ, et al. Rewiring of  
802 Genetic Networks in Response to DNA Damage. *Science*. 2010 Dec 3;330(6009):1385–  
803 9.
- 804 54. Gill R, Datta S, Datta S. Differential Network Analysis in Human Cancer Research. *Curr*  
805 *Pharm Des*. 2014 Jan 31;20(1):4–10.
- 806 55. Basha O, Shpringer R, Argov CM, Yeger-Lotem E. The DifferentialNet database of  
807 differential protein–protein interactions in human tissues. *Nucleic Acids Res*. 2018 Jan  
808 4;46(D1):D522–6.
- 809 56. Grimes T, Potter SS, Datta S. Integrating gene regulatory pathways into differential  
810 network analysis of gene expression data. *Sci Rep*. 2019 Dec;9(1):5479.

- 811 57. Ji J, He D, Feng Y, He Y, Xue F, Xie L. JDINAC: joint density-based non-parametric  
812 differential interaction network analysis and classification using high-dimensional sparse  
813 omics data. Sahinalp C, editor. *Bioinformatics*. 2017 Oct 1;33(19):3080–7.
- 814 58. Ruan D, Young A, Montana G. Differential analysis of biological networks. *BMC*  
815 *Bioinformatics*. 2015 Dec;16(1):327.
- 816 59. Mall R, Ullah E, Kunji K, D'Angelo F, Bensmail H, Ceccarelli Mi. Differential Community  
817 Detection in Paired Biological Networks. In: *Proceedings of the 8th ACM International*  
818 *Conference on Bioinformatics, Computational Biology, and Health Informatics [Internet].*  
819 *Boston Massachusetts USA: ACM; 2017 [cited 2021 Sep 20]. p. 330–9. Available from:*  
820 *<https://dl.acm.org/doi/10.1145/3107411.3107418>*
- 821 60. Levi H, Elkon R, Shamir R. DOMINO: a network-based active module identification  
822 algorithm with reduced rate of false calls. *Mol Syst Biol [Internet]*. 2021 Jan [cited 2021  
823 Sep 17];17(1). Available from: <https://onlinelibrary.wiley.com/doi/10.15252/msb.20209593>
- 824 61. Argelaguet R, Velten B, Arnol D, Dietrich S, Zenz T, Marioni JC, et al. Multi-Omics Factor  
825 Analysis—a framework for unsupervised integration of multi-omics data sets. *Mol Syst*  
826 *Biol [Internet]*. 2018 Jun [cited 2021 Sep 17];14(6). Available from:  
827 <https://onlinelibrary.wiley.com/doi/10.15252/msb.20178124>
- 828 62. Gomez-Cabrero D, Abugessaisa I, Maier D, Teschendorff A, Merckenschlager M, Gisel A,  
829 et al. Data integration in the era of omics: current and future challenges. *BMC Syst Biol*.  
830 2014;8(Suppl 2):11.
- 831 63. Qi L, Wang W, Wu T, Zhu L, He L, Wang X. Multi-Omics Data Fusion for Cancer  
832 Molecular Subtyping Using Sparse Canonical Correlation Analysis. *Front Genet*. 2021 Jul  
833 22;12:607817.
- 834 64. Huang S, Hu P, Lakowski TM. Predicting breast cancer drug response using a multiple-  
835 layer cell line drug response network model. *BMC Cancer*. 2021 Dec;21(1):648.
- 836 65. Yu MK, Ma J, Fisher J, Kreisberg JF, Raphael BJ, Ideker T. Visible Machine Learning for  
837 Biomedicine. *Cell*. 2018 Jun;173(7):1562–5.
- 838 66. AlQuraishi M, Sorger PK. Differentiable biology: using deep learning for biophysics-based  
839 and data-driven modeling of molecular mechanisms. *Nat Methods*. 2021  
840 Oct;18(10):1169–80.
- 841 67. Gross SM, Dane MA, Smith RL, Devlin K, McLean I, Derrick D, et al. A LINCS  
842 microenvironment perturbation resource for integrative assessment of ligand-mediated  
843 molecular and phenotypic responses [Internet]. *Systems Biology*; 2021 Aug [cited 2021  
844 Aug 31]. Available from: <http://biorxiv.org/lookup/doi/10.1101/2021.08.06.455429>
- 845 68. Lin JR, Fallahi-Sichani M, Sorger PK. Highly multiplexed imaging of single cells using a  
846 high-throughput cyclic immunofluorescence method. *Nat Commun*. 2015 Dec;6(1):8390.
- 847 69. Tibes R, Qiu Y, Lu Y, Hennessy B, Andreeff M, Mills GB, et al. Reverse phase protein  
848 array: validation of a novel proteomic technology and utility for analysis of primary  
849 leukemia specimens and hematopoietic stem cells. *Mol Cancer Ther*. 2006;5:2512–21.

- 850 70. Creech AL, Taylor JE, Maier VK, Wu X, Feeney CM, Udeshi ND, et al. Building the  
851 Connectivity Map of epigenetics: Chromatin profiling by quantitative targeted mass  
852 spectrometry. *Methods*. 2015 Jan;72:57–64.
- 853 71. Subramanian A, Narayan R, Corsello SM, Peck DD, Natoli TE, Lu X, et al. A Next  
854 Generation Connectivity Map: L1000 Platform and the First 1,000,000 Profiles. *Cell*.  
855 2017;171(6):1437-1452.e17.
- 856 72. Tibshirani R. Regression shrinkage and selection via the Lasso. *J R Stat Soc Ser B-  
857 Methodol*. 1996;58:267–88.
- 858 73. Subramanian A, Tamayo P, Mootha VK, Mukherjee S, Ebert BL, Gillette MA, et al. Gene  
859 set enrichment analysis: A knowledge-based approach for interpreting genome-wide  
860 expression profiles. *Proc Natl Acad Sci*. 2005 Oct 25;102(43):15545–50.
- 861 74. Jassal B, Matthews L, Viteri G, Gong C, Lorente P, Fabregat A, et al. The reactome  
862 pathway knowledgebase. *Nucleic Acids Res*. 2020 08;48(D1):D498–503.
- 863 75. Wells CM, Ahmed T, Masters JRW, Jones GE. Rho family GTPases are activated during  
864 HGF-stimulated prostate cancer-cell scattering. *Cell Motil Cytoskeleton*. 2005  
865 Nov;62(3):180–94.
- 866 76. Ye IC, Fertig EJ, DiGiacomo JW, Considine M, Godet I, Gilkes DM. Molecular Portrait of  
867 Hypoxia in Breast Cancer: A Prognostic Signature and Novel HIF-Regulated Genes. *Mol  
868 Cancer Res*. 2018 Dec;16(12):1889–901.
- 869 77. Subramanian DN, Zethoven M, McInerney S, Morgan JA, Rowley SM, Lee JEA, et al.  
870 Exome sequencing of familial high-grade serous ovarian carcinoma reveals heterogeneity  
871 for rare candidate susceptibility genes. *Nat Commun*. 2020 Apr 2;11(1):1640.
- 872 78. Kinyamu HK, Collins JB, Grissom SF, Hebbar PB, Archer TK. Genome wide  
873 transcriptional profiling in breast cancer cells reveals distinct changes in hormone  
874 receptor target genes and chromatin modifying enzymes after proteasome inhibition. *Mol  
875 Carcinog*. 2008 Nov;47(11):845–85.
- 876 79. Porter JD, Israel S, Gong B, Merriam AP, Feuerman J, Khanna S, et al. Distinctive  
877 morphological and gene/protein expression signatures during myogenesis in novel cell  
878 lines from extraocular and hindlimb muscle. *Physiol Genomics*. 2006 Mar;24(3):264–75.
- 879 80. Wang S, Zang C, Xiao T, Fan J, Mei S, Qin Q, et al. Modeling *cis* -regulation with a  
880 compendium of genome-wide histone H3K27ac profiles. *Genome Res*. 2016  
881 Oct;26(10):1417–29.
- 882 81. Arya KR, Bharath Chand RP, Abhinand CS, Nair AS, Oommen OV, Sudhakaran PR.  
883 Identification of Hub Genes and Key Pathways Associated with Anti-VEGF Resistant  
884 Glioblastoma Using Gene Expression Data Analysis. *Biomolecules*. 2021 Mar  
885 9;11(3):403.
- 886 82. Mourksi NEH, Morin C, Fenouil T, Diaz JJ, Marcel V. snoRNAs Offer Novel Insight and  
887 Promising Perspectives for Lung Cancer Understanding and Management. *Cells*. 2020  
888 Feb 26;9(3):E541.



889 83. Kinchen J, Chen HH, Parikh K, Antanaviciute A, Jagielowicz M, Fawcner-Corbett D, et al.  
890 Structural Remodeling of the Human Colonic Mesenchyme in Inflammatory Bowel  
891 Disease. *Cell*. 2018 Oct;175(2):372-386.e17.

892 84. Fang Y, Park IH, Wu AL, Du G, Huang P, Frohman MA, et al. PLD1 Regulates mTOR  
893 Signaling and Mediates Cdc42 Activation of S6K1. *Curr Biol*. 2003 Dec;13(23):2037–44.

894 85. Endo M, Antonyak MA, Cerione RA. Cdc42-mTOR signaling pathway controls Hes5 and  
895 Pax6 expression in retinoic acid-dependent neural differentiation. *J Biol Chem*. 2009 Feb  
896 20;284(8):5107–18.

897 86. Ye H, Chen T, Zeng Z, He B, Yang Q, Pan Q, et al. The m6A writers regulated by the IL-  
898 6/STAT3 inflammatory pathway facilitate cancer cell stemness in cholangiocarcinoma.  
899 *Cancer Biol Med*. 2021 Aug 4;j.issn.2095-3941.2020.0661.

900 87. Yu Y, Feng XH. TGF- $\beta$  signaling in cell fate control and cancer. *Curr Opin Cell Biol*. 2019  
901 Dec;61:56–63.

902 88. Greten FR, Grivennikov SI. Inflammation and Cancer: Triggers, Mechanisms, and  
903 Consequences. *Immunity*. 2019 Jul;51(1):27–41.

904 89. Zhao H, Wu L, Yan G, Chen Y, Zhou M, Wu Y, et al. Inflammation and tumor progression:  
905 signaling pathways and targeted intervention. *Signal Transduct Target Ther*. 2021  
906 Dec;6(1):263.

907 90. Ju X, Zhang H, Zhou Z, Wang Q. Regulation of PD-L1 expression in cancer and clinical  
908 implications in immunotherapy. *Am J Cancer Res*. 2020;10(1):1–11.

909 91. Gong J, Chehraz-Raffle A, Reddi S, Salgia R. Development of PD-1 and PD-L1 inhibitors  
910 as a form of cancer immunotherapy: a comprehensive review of registration trials and  
911 future considerations. *J Immunother Cancer*. 2018 Dec;6(1):8.

912 92. Wu Y, Chen W, Xu ZP, Gu W. PD-L1 Distribution and Perspective for Cancer  
913 Immunotherapy—Blockade, Knockdown, or Inhibition. *Front Immunol*. 2019 Aug  
914 27;10:2022.

915 93. Thiem A, Hesbacher S, Kneitz H, di Primio T, Heppt MV, Hermanns HM, et al. IFN-  
916 gamma-induced PD-L1 expression in melanoma depends on p53 expression. *J Exp Clin*  
917 *Cancer Res*. 2019 Dec;38(1):397.

918 94. Abril-Rodriguez G, Ribas A. SnapShot: Immune Checkpoint Inhibitors. *Cancer Cell*. 2017  
919 Jun;31(6):848-848.e1.

920 95. Alsaab HO, Sau S, Alzhrani R, Tatiparti K, Bhise K, Kashaw SK, et al. PD-1 and PD-L1  
921 Checkpoint Signaling Inhibition for Cancer Immunotherapy: Mechanism, Combinations,  
922 and Clinical Outcome. *Front Pharmacol*. 2017 Aug 23;8:561.

923 96. Wang Y, Liu S, Yang Z, Algazi AP, Lomeli SH, Wang Y, et al. Anti-PD-1/L1 lead-in before  
924 MAPK inhibitor combination maximizes antitumor immunity and efficacy. *Cancer Cell*.  
925 2021 Aug;S1535610821004025.

- 926 97. Abiko K, Matsumura N, Hamanishi J, Horikawa N, Murakami R, Yamaguchi K, et al. IFN- $\gamma$   
927 from lymphocytes induces PD-L1 expression and promotes progression of ovarian  
928 cancer. *Br J Cancer*. 2015 Apr;112(9):1501–9.
- 929 98. Mei Y, Chen MJM, Liang H, Ma L. A four-gene signature predicts survival and anti-CTLA4  
930 immunotherapeutic responses based on immune classification of melanoma. *Commun*  
931 *Biol*. 2021 Dec;4(1):383.
- 932 99. Xu T, Wang Z, Dong M, Wu D, Liao S, Li X. Chloride intracellular channel protein 2:  
933 prognostic marker and correlation with PD-1/PD-L1 in breast cancer. *Aging*. 2020 Sep  
934 11;12(17):17305–27.
- 935 100. Wang Z, Liu Y, Zhang P, Zhang W, Wang W, Curr K, et al. FAM83D promotes cell  
936 proliferation and motility by downregulating tumor suppressor gene FBXW7. *Oncotarget*.  
937 2013 Dec;4(12):2476–86.
- 938 101. Walian PJ, Hang B, Mao JH. Prognostic significance of FAM83D gene expression across  
939 human cancer types. *Oncotarget*. 2016 Jan 19;7(3):3332–40.
- 940 102. Huang M, Ma X, Shi H, Hu L, Fan Z, Pang L, et al. *FAM83D*, a microtubule-associated  
941 protein, promotes tumor growth and progression of human gastric cancer. *Oncotarget*.  
942 2017 Sep 26;8(43):74479–93.
- 943 103. Zhou F, Wang X, Liu F, Meng Q, Yu Y. FAM83A drives PD-L1 expression via ERK  
944 signaling and FAM83A/PD-L1 co-expression correlates with poor prognosis in lung  
945 adenocarcinoma. *Int J Clin Oncol*. 2020 Sep;25(9):1612–23.
- 946 104. Akhurst RJ, Hata A. Targeting the TGF $\beta$  signalling pathway in disease. *Nat Rev Drug*  
947 *Discov*. 2012 Oct;11(10):790–811.
- 948 105. Massagué J. TGF $\beta$  signalling in context. *Nat Rev Mol Cell Biol*. 2012 Oct;13(10):616–30.
- 949 106. Nickel J, Mueller TD. Specification of BMP Signaling. *Cells*. 2019 Dec 5;8(12):1579.
- 950 107. Derynck R, Budi EH. Specificity, versatility, and control of TGF- $\beta$  family signaling. *Sci*  
951 *Signal*. 2019 Feb 26;12(570):eaav5183.
- 952 108. Caestecker MP de. Role of Transforming Growth Factor-beta Signaling in Cancer. *J Natl*  
953 *Cancer Inst*. 2000 Sep 6;92(17):1388–402.
- 954 109. Derynck R, Turley SJ, Akhurst RJ. TGF $\beta$  biology in cancer progression and  
955 immunotherapy. *Nat Rev Clin Oncol*. 2021 Jan;18(1):9–34.
- 956 110. Guo X, Wang XF. Signaling cross-talk between TGF- $\beta$ /BMP and other pathways. *Cell*  
957 *Res*. 2009 Jan;19(1):71–88.
- 958 111. Rahman MS, Akhtar N, Jamil HM, Banik RS, Asaduzzaman SM. TGF- $\beta$ /BMP signaling  
959 and other molecular events: regulation of osteoblastogenesis and bone formation. *Bone*  
960 *Res*. 2015 Dec;3(1):15005.
- 961 112. Zhang YE. Non-Smad pathways in TGF- $\beta$  signaling. *Cell Res*. 2009 Jan;19(1):128–39.



- 962 113. Wu L, Derynck R. Essential role of TGF-beta signaling in glucose-induced cell  
963 hypertrophy. *Dev Cell*. 2009 Jul;17(1):35–48.
- 964 114. Lamouille S, Derynck R. Cell size and invasion in TGF-β-induced epithelial to  
965 mesenchymal transition is regulated by activation of the mTOR pathway. *J Cell Biol*. 2007  
966 Jul 30;178(3):437–51.
- 967 115. Mootha VK, Lindgren CM, Eriksson KF, Subramanian A, Sihag S, Lehar J, et al. PGC-1α-  
968 responsive genes involved in oxidative phosphorylation are coordinately downregulated in  
969 human diabetes. *Nat Genet*. 2003 Jul;34(3):267–73.
- 970 116. Miyazaki K. Laminin-5 (laminin-332): Unique biological activity and role in tumor growth  
971 and invasion. *Cancer Sci*. 2006 Feb;97(2):91–8.
- 972 117. Miller KA, Chung J, Lo D, Jones JCR, Thimmapaya B, Weitzman SA. Inhibition of  
973 Laminin-5 Production in Breast Epithelial Cells by Overexpression of p300. *J Biol Chem*.  
974 2000 Mar;275(11):8176–82.
- 975 118. Aberdam D, Virolle T, Simon-Assmann P. Transcriptional regulation of laminin gene  
976 expression. *Microsc Res Tech*. 2000;51(3):228–37.
- 977 119. Korang K, Christiano AM, Uitto J, Mauviel A. Differential cytokine modulation of the genes  
978 LAMA3, LAMB3, and LAMC2, encoding the constitutive polypeptides, alpha 3, beta 3,  
979 and gamma 2, of human laminin 5 in epidermal keratinocytes. *FEBS Lett*. 1995 Jul  
980 24;368(3):556–8.
- 981 120. Virolle T, Monthouel MN, Djabari Z, Ortonne JP, Meneguzzi G, Aberdam D. Three  
982 Activator Protein-1-binding Sites Bound by the Fra-2-JunD Complex Cooperate for the  
983 Regulation of Murine Laminin α3A (lama3A) Promoter Activity by Transforming Growth  
984 Factor-β. *J Biol Chem*. 1998 Jul;273(28):17318–25.
- 985 121. Domogatskaya A, Rodin S, Tryggvason K. Functional Diversity of Laminins. *Annu Rev*  
986 *Cell Dev Biol*. 2012 Nov 10;28(1):523–53.
- 987 122. Rousselle P, Keene DR, Ruggiero F, Champlaud MF, Rest M van der, Burgeson RE.  
988 Laminin 5 Binds the NC-1 Domain of Type VII Collagen. *J Cell Biol*. 1997 Aug  
989 11;138(3):719–28.
- 990 123. Gonzales M, Haan K, Baker SE, Fitchmun M, Todorov I, Weitzman S, et al. A cell signal  
991 pathway involving laminin-5, alpha3beta1 integrin, and mitogen-activated protein kinase  
992 can regulate epithelial cell proliferation. *Mol Biol Cell*. 1999 Feb;10(2):259–70.
- 993 124. Ryan MC, Lee K, Miyashita Y, Carter WG. Targeted Disruption of the LAMA3 Gene in  
994 Mice Reveals Abnormalities in Survival and Late Stage Differentiation of Epithelial Cells.  
995 *J Cell Biol*. 1999 Jun 14;145(6):1309–24.
- 996 125. Barretina J, Caponigro G, Stransky N, Venkatesan K, Margolin AA, Kim S, et al. The  
997 Cancer Cell Line Encyclopedia enables predictive modelling of anticancer drug sensitivity.  
998 *Nature*. 2012 Mar;483(7391):603–7.

- 999 126. Qian Hastie, T., Friedman, J., Tibshirani, R. and Simon, N. J. Glmnet for Matlab [Internet].  
1000 2013. Available from: [http://www.stanford.edu/~hastie/glmnet\\_matlab/](http://www.stanford.edu/~hastie/glmnet_matlab/)
- 1001 127. Shannon P, Markiel A, Ozier O, Baliga NS, Wang JT, Ramage D, et al. Cytoscape: a  
1002 software environment for integrated models of biomolecular interaction networks.  
1003 Genome Res. 2003;13:2498–504.
- 1004 128. Erdem C, Mutsuddy A, Bensman EM, Dodd WB, Saint-Antoine MM, Bouhaddou M, et al.  
1005 A scalable, open-source implementation of a large-scale mechanistic model for single cell  
1006 proliferation and death signaling. Nat Commun. 2022;13(1):3555.
- 1007
